# Supplementary material for: Effects of cardiovascular health, musculoskeletal health and physical fitness on occupational performance of firefighters: protocol for a systematic review and meta-analysis
Source: HighWire-hosted journal article supplement (doi:10.1136/bmjopen-2022-061435), 2022-07-01
Supplement: bmjopen-2022-061435supp002_data_supplement.pdf [file bmjopen-2022-061435supp002_data_supplement.pdf]

**Appendix 2**

| <b>General information</b> |  |
|----------------------------|--|
| Title                      |  |
| Author                     |  |
| Study type                 |  |
| Exposure assessed          |  |
| Outcome relevance          |  |
| Notes:                     |  |

| <b>Study eligibility</b>  |                          |    |         |
|---------------------------|--------------------------|----|---------|
| Study characteristics     | Eligibility criteria met |    |         |
|                           | Yes                      | No | Unclear |
| Type of Study             |                          |    |         |
| Type of participants      |                          |    |         |
| Type of exposure          |                          |    |         |
| Type of comparison        |                          |    |         |
| Types of outcome measures |                          |    |         |

| INCLUDE                      | EXCLUDE |
|------------------------------|---------|
| <b>Reason for exclusion:</b> |         |
